# Supplementary material for: Bi-directional effects of vitamin B12 and methotrexate on Daphnia magna fitness and genomic methylation
Source: PubMed Central journal article supplement (PMC5605502; doi:10.1038/s41598-017-12148-2), 2017-09-19

# Supplementary material for

## **Bi-directional effects of vitamin B<sub>12</sub> and methotrexate on *Daphnia magna* fitness and genomic methylation**

Running title: **Invertebrate model for environmental epigenetics**

Fitore Kusari <sup>1</sup> ([fitorekusari@gmail.com](mailto:fitorekusari@gmail.com)), Alan M. O'Doherty <sup>2</sup> ([alan.odoherty@ucd.ie](mailto:alan.odoherty@ucd.ie)),

Nikolas J. Hodges <sup>1</sup> ([n.hodges@bham.ac.uk](mailto:n.hodges@bham.ac.uk)) and Marcin W. Wojewodziec <sup>#1</sup>

([M.Wojewodziec@bham.ac.uk](mailto:M.Wojewodziec@bham.ac.uk))

# Corresponding author: Marcin W. Wojewodziec, University of Birmingham,

[M.Wojewodziec@bham.ac.uk](mailto:M.Wojewodziec@bham.ac.uk), Tel: +44 (0) 121 415 8200, Fax: +44 (0) 121 414 6056

<sup>1</sup>*University of Birmingham, School of Biosciences, Edgbaston, Birmingham, UK, B15 2TT.*

<sup>2</sup>*School of Agriculture & Food Science, University College Dublin, Belfield, Dublin 4, Ireland.*

**Supplementary Table 1** Summary statistics of generalized linear model testing the effects of vitamin B<sub>12</sub> treatments on fitness of *Daphnia magna*

|                              | Value | Standard Error | Degrees of Freedom | t-value | p-value |
|------------------------------|-------|----------------|--------------------|---------|---------|
| Intercept                    | 0.310 | 0.00048        | 75                 | 0.004   | ≤ 0.001 |
| Treatment (B <sub>12</sub> ) | 0.039 | 0.0027         | 75                 | 14.45   | ≤ 0.001 |

Generalized linear model (glm) was used to study the relationship between fitness and vitamin B<sub>12</sub> exposure. For every 1 mg/L media increase of vitamin B<sub>12</sub>, the fitness of *D.magna* increased by 0.039. The results revealed by glm are statistically significant ( $P \leq 0.001$ ).

**Supplementary Table 2** Summary statistics of the impact of vitamin B<sub>12</sub> on brood size

|                              | Estimate | Std Error | t value | Pr(> t ) |
|------------------------------|----------|-----------|---------|----------|
| Intercept                    | 33.12    | 1.65      | 20.11   | <<0.001  |
| Treatment (B <sub>12</sub> ) | 17.91    | 0.95      | 18.93   | <<0.001  |

For every mg/L of vitamin B<sub>12</sub> added to the media, the number of offspring increased by 17 compared to a control lacking vitamin B<sub>12</sub> in media.

**Supplementary Table 3** Summary statistics of generalized linear model testing the effects of MTX exposure on *Daphnia magna* fitness

|           | Value  | Standard Error | Degrees of Freedom | t-value | p-value |
|-----------|--------|----------------|--------------------|---------|---------|
| Intercept | 0.38   | 0.00059        | 75                 | 0.0059  | ≤ 0.001 |
| Treatment | -0.002 | 0.0002         | 75                 | -9.58   | ≤ 0.001 |

(Methotrexate)

MTX treatment significantly reduced fitness in *D.magna* by 0.002 for every 1 nM increase of MTX in the media ( $P \leq 0.001$ ).

**Supplementary Table 4** Summary statistics of the impact of MTX on brood size

|                    | Estimate | Std Error | t value | Pr(> t ) |
|--------------------|----------|-----------|---------|----------|
| Intercept          | 72.0852  | 3.08      | 23.43   | << 0.001 |
| Treatment<br>(MTX) | -0.8985  | 0.11      | -8.02   | <<0.001  |

MTX treatment significantly reduced brood size (first and second brood combined) of all exposed *D.magna* mothers. For every 10 nM increase of MTX in the media, the number of offspring decreased by 8.9 compared to the control.

Supplementary figure 1

Impact of B12 exposure on *Daphnia magna* on first, second and total brood size.

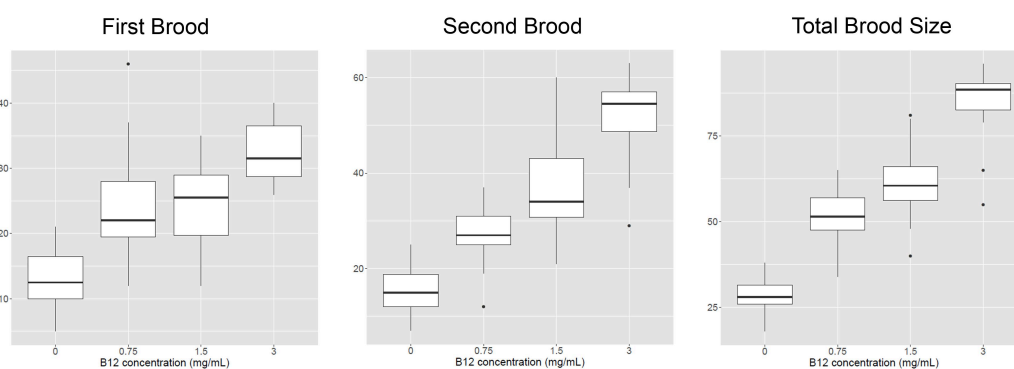

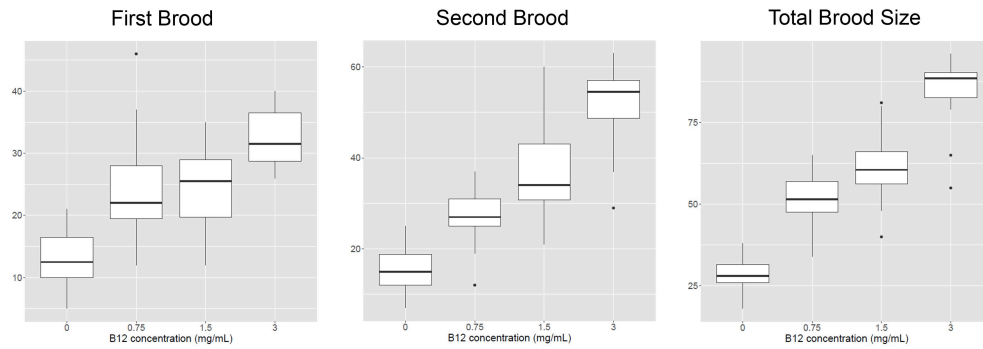

Supplementary Figure 2 Impact of MTX exposure on *Daphnia magna* on first, second and total brood size.

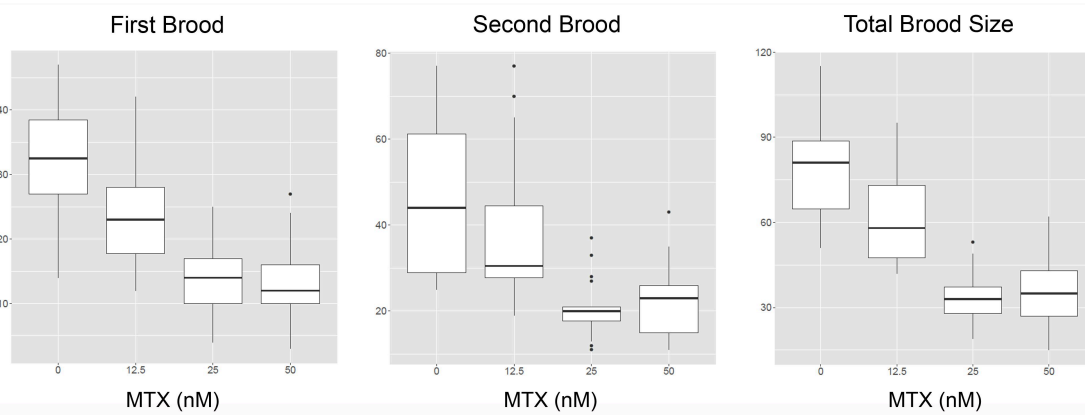

Supplementary Figure 3 The global methylation status of mammalian skin cells ( $48.7 \pm 1.2 \%$ ) surpass that of non-mammalian water fleas (Table 5, main text). Amongst *Daphnia*, animals supplemented with vitamin B12 display the highest level of CpG methylation ( $9.09 \pm 2.4 \%$ ) compared to MTX-treated animals and untreated controls (Table 5, main text). A decreasing trend in global methylation levels is observed in *Daphnia* lacking vitamin B12 and exposed to MTX.

### Methylation Sensitive COMET Assay

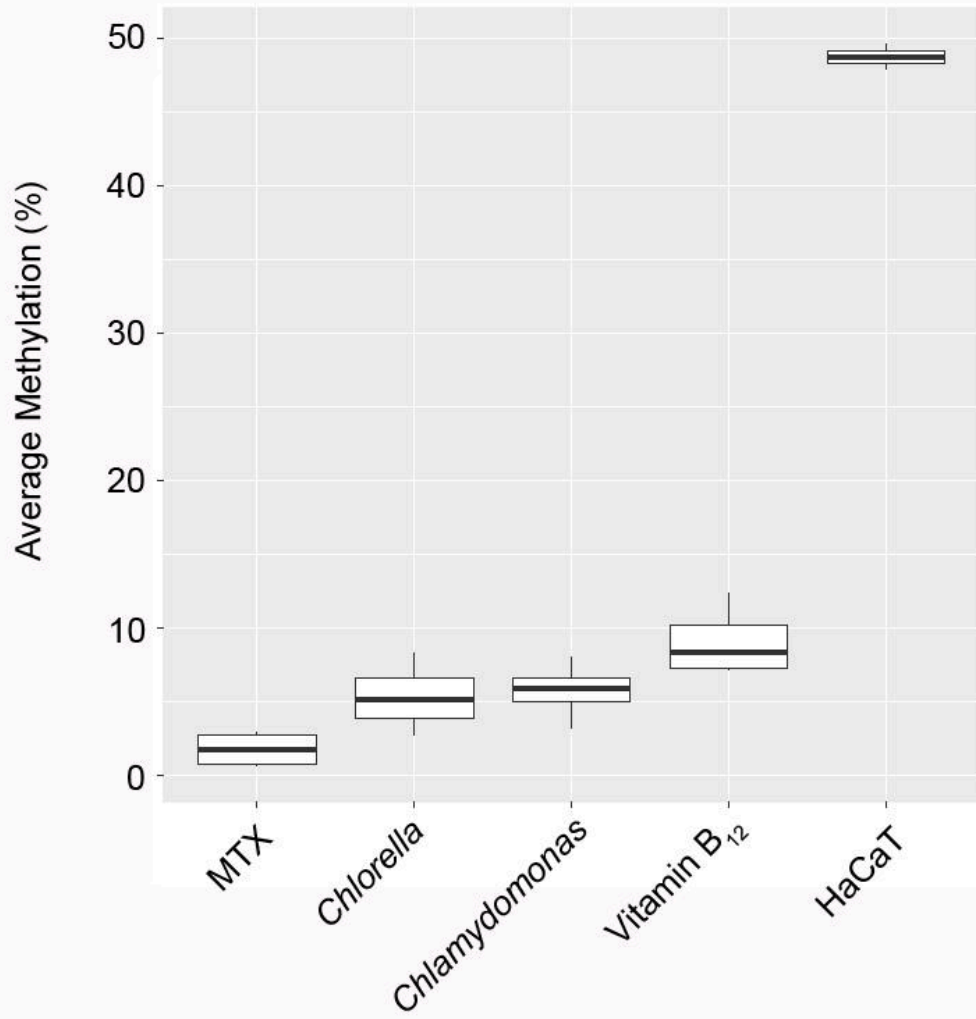

Supplement: 41598_2017_12148_MOESM1_ESM.pdf [file 41598_2017_12148_MOESM1_ESM.pdf]
